# Supplementary material
Source: MDPI journal article supplement (https://www.mdpi.com/2076-3298/9/9/116)
Supplement: s1 [file s1]

# The Potential of Constructed Wetlands Systems and Photodegradation Processes for the Removal of Emerging Contaminants—A Review

Marta Sánchez, Isabel Ruiz and Manuel Soto \*

Department of Chemistry, Faculty of Sciences & CICA, University of A Coruña,  
E-15071 A Coruña, Galiza, Spain

\* Correspondence: m.soto@udc.gal

**Table S1.** Mechanisms of EOC removal in CW based on the research papers consulted and paper references.

| EOCs | Mechanisms               | Reference                                                  |
|------|--------------------------|------------------------------------------------------------|
| ACE  | Aerobic biodegradation   | [81,82,83,86,117,153,154]                                  |
|      | Anaerobic biodegradation | [80,85–87]                                                 |
|      | Photodegradation         | [82,86]                                                    |
|      | Sorption                 | [80, 82,153]                                               |
|      | Plant uptake             | [86,87]                                                    |
|      | Other aspects            | [84]                                                       |
| OFL  | Sorption                 | [89,91,93,155]                                             |
|      | Biodegradation           | [89,91,90,93,94,128,156]                                   |
|      | Other aspects            | [84,157]                                                   |
| CBZ  | Sorption                 | [92,99,113,126,154,158–161]                                |
|      | Plant uptake             | [90,96,100,113,158,162,163]                                |
|      | Aerobic biodegradation   | [101]                                                      |
|      | Reduction transformation | [97,98]                                                    |
|      | Other aspects            | [84]                                                       |
| CAF  | Aerobic biodegradation   | [83,85,97,103,102,109,118,154]                             |
|      | Plant uptake             | [80,86,96,101,119,162,164,165]                             |
|      | Anaerobic biodegradation | [80,83,97,100,101,109,126]                                 |
|      | Sorption                 | [85,102,162]                                               |
|      | Other aspects            | [84]                                                       |
| KET  | Photodegradation         | [78,79,107,110,111,166–168]                                |
|      | Biodegradation           | [80,101,107–109,166]                                       |
|      | Other aspects            | [108]                                                      |
| IBU  | Aerobic biodegradation   | [15,17,18,80,82,85,98,101,107,113,117,118,159,165,169,170] |
|      | Sorption                 | [102,112,158]                                              |
|      | Photodegradation         | [85,111,115]                                               |
|      | Plant uptake             | [101,107,171–173]                                          |
|      | Other aspects            | [84,19]                                                    |
| DCL  | Photodegradation         | [78–80,82,107,166–168]                                     |
|      | Aerobic biodegradation   | [82,97,103,117,158]                                        |
|      | Anaerobic biodegradation | [17,80,97,98,100,103,107,118]                              |
|      | Plant uptake             | [101,119,158,174]                                          |
|      | Other aspects            | [84,157]                                                   |

|            |                        |                            |
|------------|------------------------|----------------------------|
| <b>ACB</b> | Sorption               | [92,121,175]               |
|            | Photodegradation       | [75]                       |
|            | Biodegradation         | [108]                      |
|            | Plant uptake           | [92]                       |
|            | Other aspects          | [102,105]                  |
| <b>BPA</b> | Aerobic biodegradation | [17,18,82,117,118,125,176] |
|            | Sorption               | [35,125]                   |
|            | Plant uptake           | [123,124]                  |
|            | Other aspects          | [122,177]                  |
| <b>SOT</b> | Photodegradation       | [78,79,130]                |
|            | Sorption               | [112]                      |
|            | Aerobic biodegradation | [112,130]                  |
|            | Other aspects          | [15]                       |

Acronyms: ACE: acetaminophen, OFL: ofloxacin, CAF: caffeine, CBZ: carbamazepine, KET: ketoprofen, IBU: ibuprofen, DCL: diclofenac, ACB: clofibric acid, BPA: bisphenolA, SOT: sotalol.

**Table S2.** Minimum and maximum (or mean) removal rates for each EOC and each technology evaluated in the literature on WWTPs.

| Pollutant | Technology Type                                                | Removal (%) |               | Reference |
|-----------|----------------------------------------------------------------|-------------|---------------|-----------|
|           |                                                                | MIN         | MAX<br>(Mean) |           |
| ACE       | MBR (microfiltration membrane)                                 | (99.9)      |               | [51]      |
|           | MBR (microfiltration membrane) with coagulation post-treatment | (99.9)      |               | [51]      |
|           | MBR (microfiltration membrane)                                 | 72.0        | 100.0         | [51]      |
|           | Municipal WWTPs                                                | 65.0        | 100.0         | [3]       |
|           | Conventional activated sludge                                  | 80.0        | 100.0         | [48]      |
|           | MBR                                                            | 80.0        | 100.0         | [48]      |
| OFL       | Municipal WWTPs                                                | 72.0        | 99.9          | [3]       |
|           | Conventional activated sludge                                  | 60.0        | 80.0          | [48]      |
|           | MBR                                                            | 80.0        | 100.0         | [48]      |
|           | CAS                                                            | (75.0)      |               | [44]      |
|           | MBR                                                            | 93.5        | 93.5          | [44]      |
| CBZ       | MBR (microfiltration membrane before PAC addition)             | (0.0)       |               | [49]      |
|           | MBR (microfiltration membrane after PAC addition)              | 45.0        | 98.0          | [49]      |
|           | MBR (ultrafiltration membrane before PAC addition)             | (0.0)       |               | [49]      |
|           | MBR (ultrafiltration membrane after PAC addition)              | 70.0        | 92.0          | [49]      |
|           | MBR (microfiltration membrane)                                 | (25.5)      |               | [51]      |
|           | MBR (microfiltration membrane)                                 | −40.0       | 23.0          | [51]      |
|           | Conventional WWTPs                                             | 0.0         | 83.0          | [42]      |
|           | Municipal WWTPs                                                | −69.4       | 99.0          | [3]       |
|           | Conventional activated sludge                                  | 60.0        | 80.0          | [48]      |
| CAF       | MBR                                                            | 60.0        | 80.0          | [48]      |
|           | MBR (microfiltration membrane)                                 | (98.0)      |               | [51]      |
|           | MBR (microfiltration membrane) with coagulation post-treatment | (98.0)      |               | [51]      |
|           | MBR (microfiltration membrane)                                 | 80.0        | 100.0         | [51]      |
|           | Conventional WWTPs                                             | 84.0        | 99.9          | [42]      |
|           | Municipal WWTPs                                                | 70.0        | 99.0          | [3]       |

|     |                                                                               |         |       |       |
|-----|-------------------------------------------------------------------------------|---------|-------|-------|
|     | Conventional activated sludge                                                 | 80.0    | 100.0 | [48]  |
|     | MBR                                                                           | 60.0    | 80.0  | [48]  |
| KET | MBR (microfiltration membrane)                                                | (83.0)  |       | [51]  |
|     | MBR (microfiltration membrane) with coagulation post-treatment                | (89.0)  |       | [51]  |
|     | MBR (microfiltration membrane)                                                | 70.0    | 99.0  | [51]  |
|     | Conventional WWTPs                                                            | 52.0    | 92.0  | [42]  |
|     | Municipal WWTPs                                                               | −83.0   | 100.0 | [3]   |
|     | Conventional activated sludge                                                 | 60.0    | 80.0  | [48]  |
|     | MBR                                                                           | 0.0     | 20.0  | [48]  |
| IBU | MBR (microfiltration membrane before PAC addition)                            | (92.0)  |       | [49]  |
|     | MBR (microfiltration membrane after PAC addition)                             | 85.0    | 99.9  | [49]  |
|     | MBR (ultrafiltration membrane before PAC addition)                            | (99.0)  |       | [49]  |
|     | MBR (ultrafiltration membrane after PAC addition)                             | 97.0    | 99.9  | [49]  |
|     | Conventional WWTPs                                                            | 0.0     | 99.9  | [42]  |
|     | Municipal WWTPs                                                               | 76.0    | 100.0 | [3]   |
|     | Conventional activated sludge                                                 | 80.0    | 100.0 | [48]  |
| DLC | MBR                                                                           | 80.0    | 100.0 | [48]  |
|     | MBR (microfiltration membrane before PAC addition)                            | (29.0)  |       | [49]  |
|     | MBR (microfiltration membrane after PAC addition)                             | 40.0    | 84.0  | [49]  |
|     | MBR (ultrafiltration membrane before PAC addition)                            | (62.0)  |       | [49]  |
|     | MBR (ultrafiltration membrane after PAC addition)                             | 54.0    | 95.0  | [49]  |
|     | MBR (microfiltration membrane)                                                | (−18.0) |       | [51]  |
|     | MBR (microfiltration membrane)                                                | 7.0     | 90.0  | [51]  |
|     | Conventional WWTPs                                                            | 0.0     | 98.0  | [42]  |
|     | Municipal WWTPs                                                               | −232.0  | 99.9  | [3]   |
|     | Conventional activated sludge                                                 | 60.0    | 80.0  | [48]  |
| ACB | MBR                                                                           | 20.0    | 40.0  | [48]  |
|     | MBR (microfiltration membrane)                                                | 0.0     | 0.0   | [51]  |
|     | Conventional WWTPs                                                            | 28.0    | 72.0  | [42]  |
|     | Municipal WWTPs                                                               | 20.0    | 76.0  | [3]   |
| BPA | Conventional WWTPs                                                            | 32.0    | 99.9  | [42]  |
|     | WWTPs                                                                         | 10.0    | 99.0  | [55]  |
|     | Conventional activated sludge                                                 | 80.0    | 100.0 | [48]  |
|     | MBR                                                                           | 80.0    | 100.0 | [48]  |
| SOT | Municipal WWTPs                                                               | (11.9)  |       | [3]   |
|     | MBR                                                                           | 60.0    | 80.0  | [48]  |
|     | CAS                                                                           | (10.0)  |       | [178] |
|     | CAS                                                                           | −10.1   | 52.9  | [53]  |
|     | MBR (MBR was equipped with hollow-fibre (HF) ultra-filtration (UF) membranes) | 29.0    | 77.2  | [53]  |
|     | MBR (MBR operated with micro-filtration (MF) flat-sheet (FS) membrane module) | 5.1     | 55.7  | [53]  |

Acronyms: ACE: acetaminophen, OFL: ofloxacin, CAF: caffeine, CBZ: carbamazepine, KET: keto-profen, IBU: ibuprofen, DCL: diclofenac, ACB: clofibric acid, BPA: bisphenolA, SOT: sotalol.

**Table S3.** Minimum and maximum (or mean) removal rates for each EOC and each technology evaluated in the literature on ADs.

| Pollutant | Technology Type                     | Removal (%) |               | Reference |
|-----------|-------------------------------------|-------------|---------------|-----------|
|           |                                     | MIN         | MAX<br>(Mean) |           |
| ACE       | Hybrid sludge bed-filter AD (lab)   |             | (84)          | [30]      |
|           | Hybrid sludge bed-filter AD (pilot) |             | (59)          | [41]      |
| OFL       | Hybrid sludge bed-filter AD (lab)   |             | (35)          | [30]      |
| CBZ       | AD of sewage sludge from a STP      | 0.0         | 20.0          | [66]      |
|           | UASB                                | 5.0         | 10.0          | [19]      |
|           | UASB                                |             | (15.0)        | [58]      |
|           | Hybrid sludge bed-filter AD (pilot) |             | (5)           | [31]      |
| CAF       | AD (UASB)                           | 10.0        | 33.0          | [19]      |
|           | Hybrid sludge bed-filter AD (lab)   |             | (56)          | [30]      |
|           | Hybrid sludge bed-filter AD (pilot) |             | (6)           | [41]      |
| KET       | AD (UASB)                           | 25.0        | 25.0          | [19]      |
|           | AD (EGSB)                           | 70.0        | 70.0          | [46]      |
|           | Hybrid sludge bed-filter AD (lab)   |             | (42)          | [30]      |
|           | Hybrid sludge bed-filter AD (pilot) |             | (21)          | [41]      |
| IBU       | AD of sewage sludge from a STP      | 28.0        | 63.0          | [66]      |
|           | UASB                                | 10.0        | 20.0          | [19]      |
|           | UASB                                |             | (30.0)        | [70]      |
|           | UASB with GAC                       |             | (60.0)        | [70]      |
|           | UASB                                |             | (15.0)        | [58]      |
|           | Hybrid sludge bed-filter AD (pilot) |             | (0)           | [31]      |
| DCL       | AD of sewage sludge from a STP      | 0.0         | 78.0          | [66]      |
|           | CAS                                 |             | (26.0)        | [69]      |
|           | AD (Digested sludge)                |             | (13.0)        | [69]      |
|           | UASB                                |             | (60.0)        | [70]      |
|           | UASB with GAC                       |             | (67.0)        | [70]      |
|           | UASB                                |             | (0.0)         | [71]      |
|           | UASB                                |             | (15.0)        | [58]      |
| ACB       | Hybrid sludge bed-filter AD (pilot) |             | (35)          | [31]      |
|           | Hybrid sludge bed-filter AD (lab)   |             | (0)           | [30]      |
|           | Hybrid sludge bed-filter AD (pilot) |             | (5)           | [31]      |
| BPA       | UASB                                |             | (0.0)         | [71]      |
|           | Hybrid sludge bed-filter AD (lab)   |             | (8)           | [30]      |
|           | Hybrid sludge bed-filter AD (pilot) |             | (0)           | [31]      |
| SOT       | Hybrid sludge bed-filter AD (lab)   |             | (29)          | [30]      |
|           | Hybrid sludge bed-filter AD (pilot) |             | (6)           | [31]      |

Acronyms: ACE: acetaminophen, OFL: ofloxacin, CAF: caffeine, CBZ: carbamazepine, KET: keto-profen, IBU: ibuprofen, DCL: diclofenac, ACB: clofibric acid, BPA: bisphenolA, SOT: sotalol.

**Table S4.** Minimum and maximum (or mean) removal rates for each EOC and each technology evaluated in the literature on CWs.

| Pollutant | Technology Type | Removal (%) |               | Reference |
|-----------|-----------------|-------------|---------------|-----------|
|           |                 | MIN         | MAX<br>(Mean) |           |
| ACE       | CW              | 80.0        | 100.0         | [48]      |
|           | SF CW           | (89.0)      |               | [83]      |
|           | SF CW           | (99.0)      |               | [84]      |
|           | HF CW           | 95.0        | 100.0         | [80]      |
|           | HF CW           | 46.0        | 94.0          | [84]      |
|           | HF CW           | 86.0        | 99.0          | [85]      |
|           | VF CW           | (94.0)      |               | [82]      |
|           | VF CW           | (90.0)      |               | [83]      |
|           | VF CW           | 96.0        | 98.0          | [84]      |
|           | VF CW           | 71.3        |               | [30]      |
|           | VF CW           | 98.5        |               | [31]      |
|           | Hybrid CW       | (100.0)     |               | [89]      |
| OFL       | SF CW           | 92.0        | 98.0          | [94]      |
|           | HF CW           | 94.0        | 100.0         | [84]      |
|           | HF CW           | 63.0        | 92.0          | [88]      |
|           | HF CW           | (90.0)      |               | [90]      |
|           | HF CW           | 89.0        | 97.0          | [94]      |
|           | VF CW           | (0.0)       |               | [93]      |
|           | VF CW           | (90.0)      |               | [93]      |
|           | VF CW           | 36.0        | 93.0          | [94]      |
|           | VF CW           | 77.0        | 97.0          | [84]      |
|           | VF CW           | (100.0)     |               | [30]      |
| CBZ       | CW              | 20.0        | 40.0          | [48]      |
|           | SF CW           | 9.0         | 53.0          | [84]      |
|           | SF CW           | 45.0        | 55.0          | [79]      |
|           | HF CW           | 10.0        | 54.0          | [84]      |
|           | HF CW           | (2.0)       |               | [97]      |
|           | HF CW           | (13.0)      |               | [98]      |
|           | HF CW           | (50.0)      |               | [99]      |
|           | HF CW           | 43.0        | 62.0          | [90]      |
|           | HF CW           | 0.0         | 21.0          | [100]     |
|           | VF CW           | 20.0        | 60.0          | [84]      |
|           | VF CW           | (−8.0)      |               | [97]      |
|           | VF CW           | (−9.0)      |               | [98]      |
|           | VF CW           | (5.1)       |               | [31]      |
|           | CW              | 80.0        | 100.0         | [48]      |
| CAF       | SF CW           | (94.0)      |               | [83]      |
|           | SF CW           | 33.0        | 91.0          | [84]      |
|           | HF CW           | 93.0        | 99.0          | [80]      |
|           | HF CW           | 68.0        | 100.0         | [84]      |
|           | HF CW           | (93.0)      |               | [97]      |
|           | HF CW           | (83.0)      |               | [98]      |
|           | HF CW           | 96.0        | 100.0         | [100]     |
|           | HF CW           |             |               |           |

|     |       |        |       |       |
|-----|-------|--------|-------|-------|
|     | HF CW | 85.0   | 100.0 | [103] |
|     | HF CW | 85.0   | 100.0 | [102] |
|     | VF CW | (97.0) |       | [83]  |
|     | VF CW | 95.0   | 99.0  | [84]  |
|     | VF CW | (97.0) |       | [97]  |
|     | VF CW | (96.0) |       | [98]  |
|     | VF CW | (55.2) |       | [30]  |
|     | VF CW | (99.9) |       | [31]  |
| KET | CW    | 80.0   | 100.0 | [48]  |
|     | SF CW | 18.0   | 78.0  | [84]  |
|     | SF CW | (100)  |       | [79]  |
|     | SF CW | 52.0   | 91.0  | [107] |
|     | HF CW | 47.0   | 91.0  | [80]  |
|     | HF CW | 12.0   | 82.0  | [84]  |
|     | HF CW | 48.0   | 55.0  | [107] |
|     | HF CW | 0.0    | 74.0  | [110] |
|     | HF CW | (90)   |       | [105] |
|     | VF CW | 47.0   | 53.0  | [107] |
|     | VF CW | 47.0   | 53.0  | [84]  |
|     | VF CW | (7.2)  |       | [30]  |
|     | VF CW | (99.1) |       | [31]  |
|     | CW    | 80.0   | 100.0 | [48]  |
| IBU | SF CW | 29.0   | 85.0  | [84]  |
|     | SF CW | 15.0   | 25.0  | [107] |
|     | SF CW | (94.0) |       | [82]  |
|     | SF CW | 3.0    | 7.0   | [17]  |
|     | SF CW | 49.0   | 96.0  | [11]  |
|     | HF CW | (24.0) |       | [17]  |
|     | HF CW | 98.0   | 99.0  | [118] |
|     | HF CW | 74.0   | 99.0  | [80]  |
|     | HF CW | 26.0   | 80.0  | [84]  |
|     | HF CW | (19.0) |       | [97]  |
|     | HF CW | (28.0) |       | [98]  |
|     | HF CW | 65.0   | 100.0 | [100] |
|     | HF CW | 41.0   | 79.0  | [107] |
|     | HF CW | (87.0) |       | [82]  |
|     | VF CW | 95.0   | 99.0  | [18]  |
|     | VF CW | 50.0   | 63.0  | [17]  |
|     | VF CW | 55.0   | 100.0 | [84]  |
|     | VF CW | (95.0) |       | [97]  |
|     | VF CW | (95.0) |       | [98]  |
|     | VF CW | 40.0   | 65.0  | [107] |
|     | VF CW | (73.0) |       | [82]  |
|     | VF CW | 100.0  |       | [31]  |
| DCL | CW    | 80.0   | 100.0 | [48]  |
|     | SF CW | (64.0) |       | [82]  |
|     | SF CW | 18.0   | 66.0  | [84]  |
|     | SF CW | 44.0   | 68.0  | [107] |

|     |       |            |       |
|-----|-------|------------|-------|
|     | SF CW | (22.0)     | [17]  |
|     | SF CW | (100.0)    | [79]  |
|     | HF CW | (27.0)     | [17]  |
|     | HF CW | (99.0)     | [118] |
|     | HF CW | 17.0 95.0  | [80]  |
|     | HF CW | 15.0 63.0  | [84]  |
|     | HF CW | (17.9)     | [97]  |
|     | HF CW | (25.0)     | [98]  |
|     | HF CW | 35.0 61.0  | [100] |
|     | HF CW | 42.0 52.0  | [107] |
|     | HF CW | (44.0)     | [82]  |
|     | VF CW | 33.0 67.0  | [84]  |
|     | VF CW | 59.0 62.0  | [17]  |
|     | VF CW | (53.0)     | [97]  |
|     | VF CW | (53.0)     | [98]  |
|     | VF CW | 54.0 70.0  | [18]  |
|     | VF CW | 40.0 43.0  | [107] |
|     | VF CW | (32.2)     | [82]  |
|     | VF CW | (71.3)     | [31]  |
| ACB | SF CW | 21.0 39.0  | [84]  |
|     | SF CW | (100.0)    | [79]  |
|     | HF CW | 25.0 73.0  | [84]  |
|     | HF CW | 33.0 39.0  | [108] |
|     | HF CW | 48.0 75.0  | [92]  |
|     | VF CW | (0.2)      | [30]  |
|     | VF CW | (24.2)     | [31]  |
| BPA | CW    | 80.0 100.0 | [48]  |
|     | SF CW | (100.0)    | [82]  |
|     | SF CW | 5.0 15.0   | [17]  |
|     | HF CW | (19.0)     | [82]  |
|     | HF CW | (11.0)     | [17]  |
|     | HF CW | 43.0 97.0  | [123] |
|     | HF CW | (76.0)     | [124] |
|     | HF CW | (50.0)     | [125] |
|     | HF CW | 0.0 20.0   | [126] |
|     | HF CW | 85.0 99.0  | [118] |
|     | VF CW | (44.0)     | [82]  |
|     | VF CW | 60.0 83.0  | [17]  |
|     | VF CW | 57.0 95.0  | [18]  |
|     | VF CW | (2.2)      | [30]  |
|     | VF CW | (78.1)     | [31]  |
| SOT | SF CW | 7.0 23.0   | [84]  |
|     | SF CW | 20.0 68.0  | [79]  |
|     | HF CW | 6.0 39.0   | [84]  |
|     | HF CW | (5.0)      | [16]  |
|     | VF CW | (8.1)      | [30]  |
|     | VF CW | (21.8)     | [31]  |

Acronyms: ACE: acetaminophen, OFL: ofloxacin, CAF: caffeine, CBZ: carbamazepine, KET: keto-profen, IBU: ibuprofen, DCL: diclofenac, ACB: clofibric acid, BPA: bisphenolA, SOT: sotalol.

**Table S5.** Minimum and maximum (or mean) removal rates for each EOC and each technology evaluated in the literature on PD by UV photolysis and TiO<sub>2</sub>-based photocatalysis.

| Pollutant | Technology type                                                                     | Removal (%)<br>(mean) | Reference |
|-----------|-------------------------------------------------------------------------------------|-----------------------|-----------|
| ACE       | PD (UV)                                                                             | 100.0                 | [30]      |
|           | PD (UV)                                                                             | 70.0                  | [31]      |
|           | UVA/TiO <sub>2</sub> 2h                                                             | 90.0                  | [31]      |
|           | Sol/TiO <sub>2</sub> 2h                                                             | 23.0                  | [31]      |
| OFL       | PD (UV)                                                                             | 0.0                   | [30]      |
|           | PD (UV)                                                                             | 0.0                   | [29]      |
|           | Solar/TiO <sub>2</sub> (33 Wh/m <sup>2</sup> ) (WW post-treatment)                  | 85.0                  | [141]     |
|           | Controlled irradiation/TiO <sub>2</sub> (55 Wh/m <sup>2</sup> ) (WW post-treatment) | 70.0                  | [141]     |
| CBZ       | Simulated Sun/TiO <sub>2</sub> 96h (WW post-treatment)                              | 76.0                  | [142]     |
|           | Solar/TiO <sub>2</sub> (33 Wh/m <sup>2</sup> ) (WW post-treatment)                  | 22.0                  | [141]     |
|           | Controlled irradiation/TiO <sub>2</sub> (55 Wh/m <sup>2</sup> ) (WW post-treatment) | 27.0                  | [141]     |
|           | PD (UV)                                                                             | 47.0                  | [31]      |
|           | UVA/TiO <sub>2</sub> 2h                                                             | 77.0                  | [31]      |
|           | Sol/TiO <sub>2</sub> 2h                                                             | 61.0                  | [31]      |
| CAF       | PD (UV)                                                                             | 21.0                  | [30]      |
| KET       | PD (UV)                                                                             | 100.0                 | [30]      |
|           | PD (UV)                                                                             | 94.7                  | [29]      |
| IBU       | PD (UV)                                                                             | 100.0                 | [29]      |
|           | Simulated Sun/TiO <sub>2</sub> 96h (WW posttreatment)                               | 74.0                  | [142]     |
| DCL       | Simulated Sun/TiO <sub>2</sub> 96h (WW posttreatment)                               | 100.0                 | [142]     |
|           | Solar/TiO <sub>2</sub> (33 Wh/m <sup>2</sup> ) (WW posttreatment)                   | 100.0                 | [141]     |
|           | Controlled irradiation/TiO <sub>2</sub> (55 Wh/m <sup>2</sup> ) (WW posttreatment)  | 97.0                  | [141]     |
| ACB       | PD (UV)                                                                             | 100.0                 | [30]      |
|           | PD (UV)                                                                             | 87.2                  | [29]      |
|           | PD (UV)                                                                             | 100.0                 | [31]      |
|           | UVA/TiO <sub>2</sub> 2h                                                             | 76.0                  | [31]      |
|           | Sol/TiO <sub>2</sub> 2h                                                             | 67.0                  | [31]      |
| BPA       | PD (UV)                                                                             | 14.0                  | [30]      |
|           | PD (UV)                                                                             | 88.4                  | [29]      |
|           | PD (UV)                                                                             | 17.0                  | [31]      |
|           | UVA/TiO <sub>2</sub> 2h                                                             | 6.0                   | [31]      |
|           | Sol/TiO <sub>2</sub> 2h                                                             | 33.0                  | [31]      |
| SOT       | PD (UV)                                                                             | 100.0                 | [30]      |
|           | PD (UV)                                                                             | 92.9                  | [29]      |
|           | PD (UV)                                                                             | 97.0                  | [31]      |
|           | UVA/TiO <sub>2</sub> 2h                                                             | 58.0                  | [31]      |
|           | Sol/TiO <sub>2</sub> 2h                                                             | 44.0                  | [31]      |

Acronyms: ACE: acetaminophen, OFL: ofloxacin, CAF: caffeine, CBZ: carbamazepine, KET: keto-profen, IBU: ibuprofen, DCL: diclofenac, ACB: clofibric acid, BPA: bisphenolA, SOT: sotalol.
